# Supplementary material for: Carbon Dots with Up-Conversion Luminescence as pH Nanosensor
Source: MDPI journal article supplement (doi:10.3390/app122312006), 2022-11-24
Supplement: s1 [file s1]

Article

# Carbon Dots with Up-Conversion Luminescence as pH Nanosensor

Kirill Laptinskiy <sup>1,2</sup>, Maria Khmeleva <sup>1</sup>, Alexey Vervalde <sup>1</sup>, Sergey Burikov <sup>1,2</sup> and Tatiana Dolenko <sup>1,2,\*</sup>

<sup>1</sup> Faculty of Physics, M.V. Lomonosov Moscow State University, Leninskie Gory 1/2, 119991 Moscow, Russia

<sup>2</sup> D.V. Skobeltsyn Institute of Nuclear Physics, M.V. Lomonosov Moscow State University, Leninskie Gory 1/2, 119991 Moscow, Russia

\* Correspondence: tdolenko@mail.ru

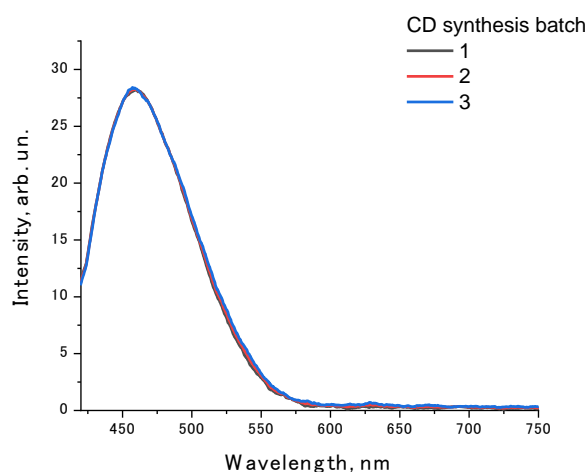

**Figure S1.** Reproducibility of up-conversion luminescence of CD aqueous suspension obtained in different synthesis batches under the same synthesis conditions.

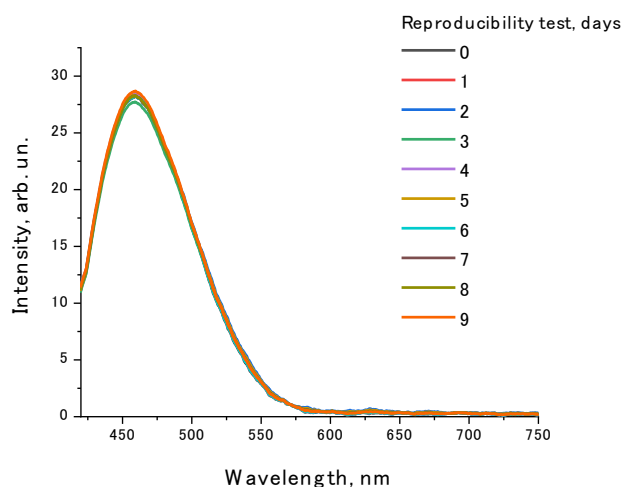

**Figure S2.** Demonstration of the up-conversion luminescence stability of aqueous suspension of CDs for 10 days.
